# Supplementary material for: Selective hydrodeoxygenation of oxygenated aromatic molecules using a molecular palladium catalyst covalently bound to a solid SiO2 support
Source: Royal Society of Chemistry journal article supplement (doi:10.1039/d4su00333k), 2024-01-01
Supplement: d4su00333k1.pdf [file d4su00333k1.pdf]

Supporting Information for:

**Selective Hydrodeoxygenation of Oxygenated Aromatic Molecules Using a  
Molecular Palladium Catalyst Covalently Bound to a Solid SiO<sub>2</sub> Support**

Jake G. Tillou<sup>a</sup>, Joseph J. Kuchta III<sup>a</sup>, Nathan Thornburg<sup>b</sup>, Santosh K. Balijepalli<sup>c</sup>, and Aaron K. Vannucci<sup>a,\*</sup>

<sup>a</sup>Department of Chemistry and Biochemistry, University of South Carolina, Columbia, SC 29208, USA

<sup>b</sup>Department of Chemical Engineering, University of South Carolina, Columbia, SC 29208, USA

<sup>c</sup>Office of Vice President for Research, University of South Carolina, Columbia, SC 29208, USA

**Corresponding Author**

\*E-mail: [vannucci@mailbox.sc.edu](mailto:vannucci@mailbox.sc.edu)

Table of Contents

Pre-Reaction Characterization – pg. S2-S3

Post-Reaction Characterization – pg. S3-S4

GC-MS Calibration Curves – pg. S5-S6

Reaction Kinetic Plots – pg. S6-S8

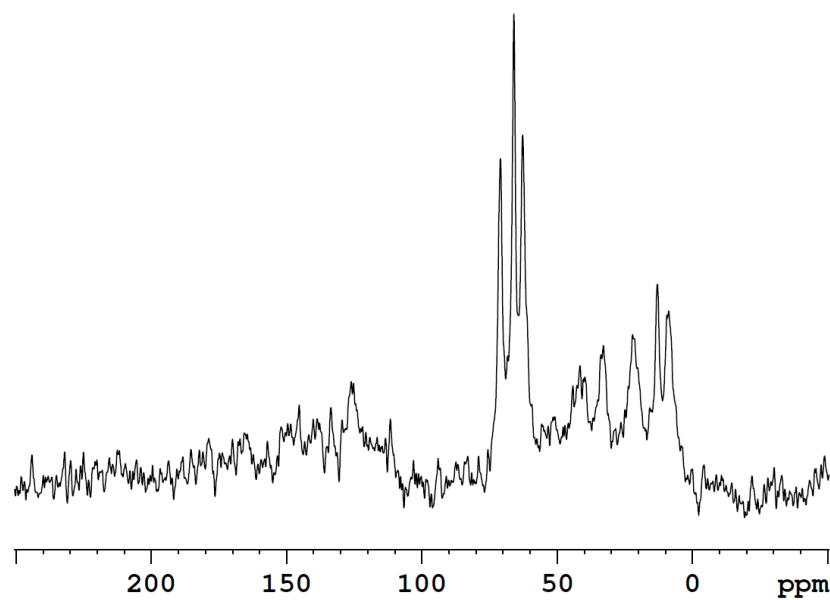

**Figure S1:** Solid-State  $^{13}\text{C}$  NMR spectra of catalyst chloro(2,6-bis(1-methylbenzimidazolyl)pyridine-4'-aminopropyl trisiloxane) palladium(II) nitrate/A300 (**3**).

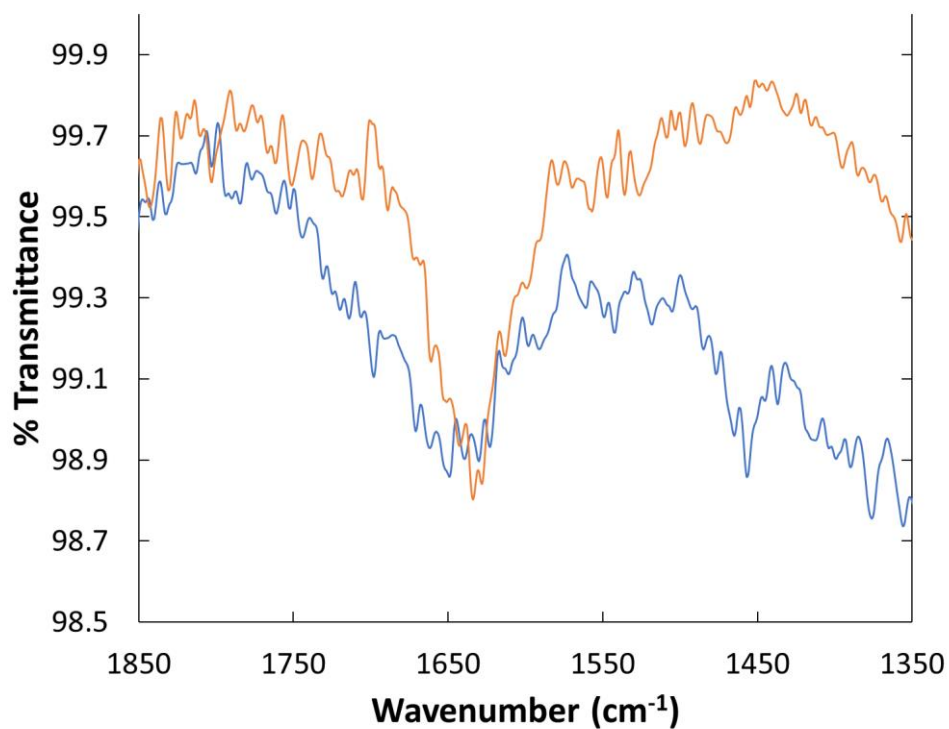

**Figure S2:** IR spectroscopy data for A300 silica (orange) and **3** (blue).

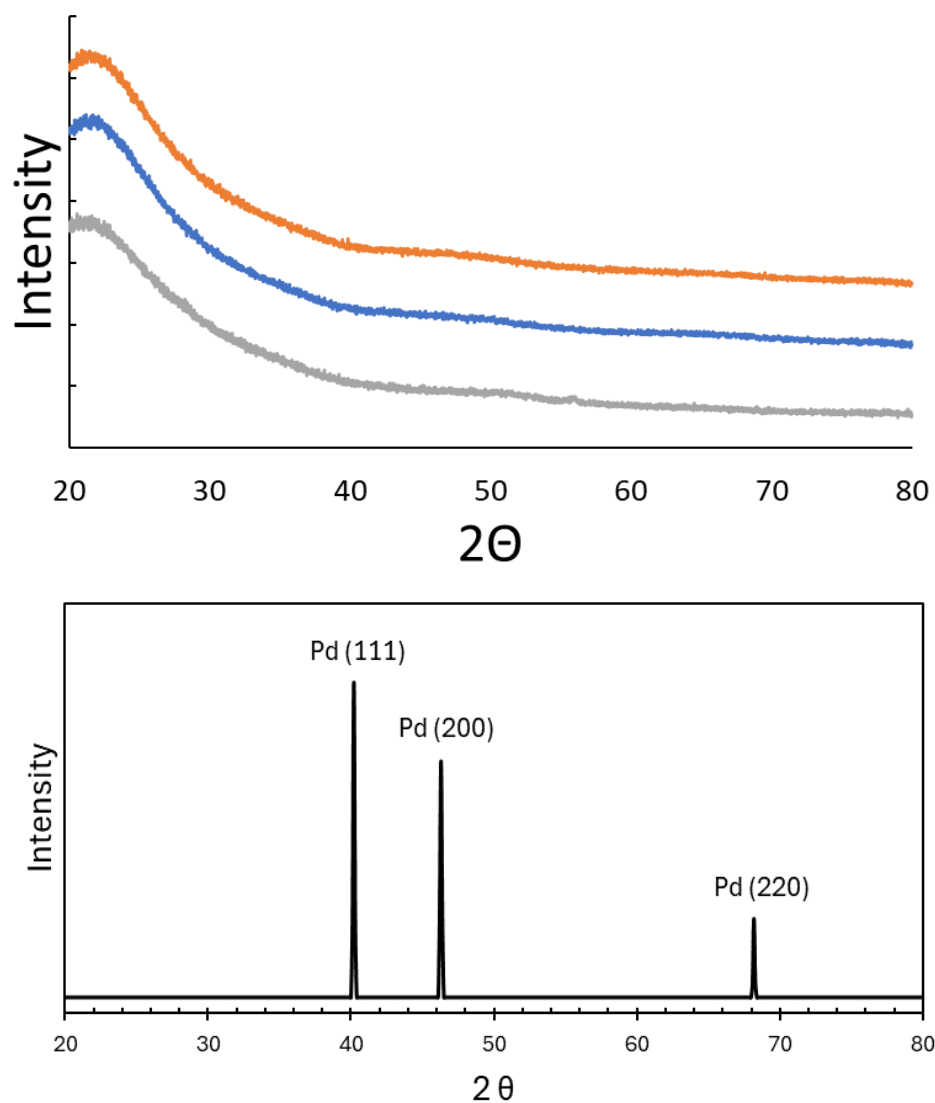

**Figure S3:** Top: Powder X-ray diffraction profiles of A300 silica support (grey), pre-reaction **3** (blue), and post-reaction **3** (orange). Reaction conditions as describe in entry 5 of Table 1. Bottom: Simulated spectrum of metallic Pd nanoparticles on  $\text{SiO}_2$  support.

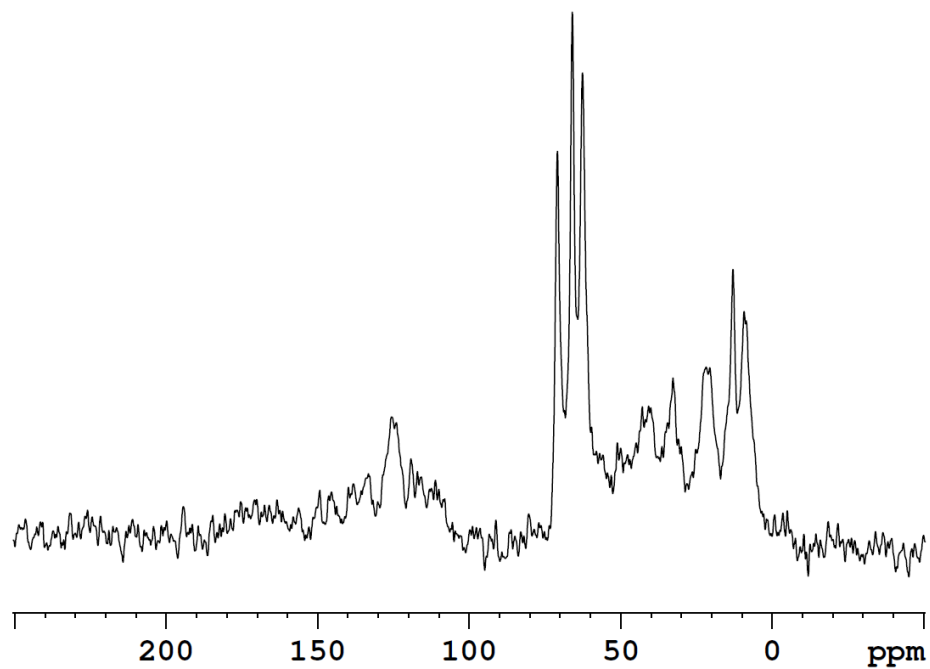

**Figure S4:** Solid-State  $^{13}\text{C}$  NMR spectra of **3** following reaction in n-dodecane as described in entry 5 of Table 1.

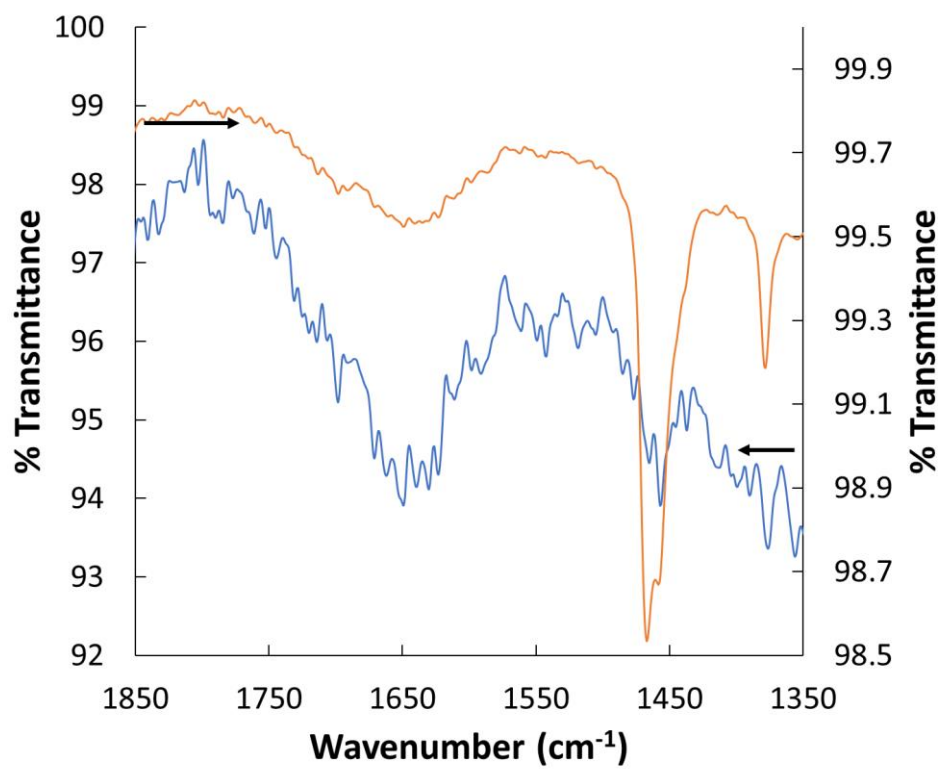

**Figure S5:** IR spectroscopy data of pre-reaction **3** (blue) and post-reaction **3** (orange).

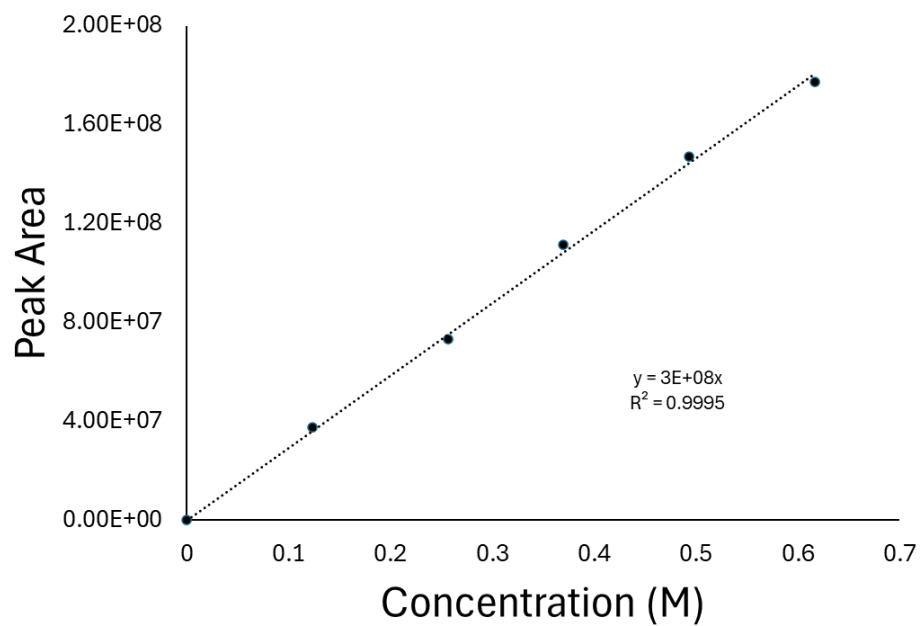

**Figure S6:** GC-MS calibration curve for benzyl alcohol.

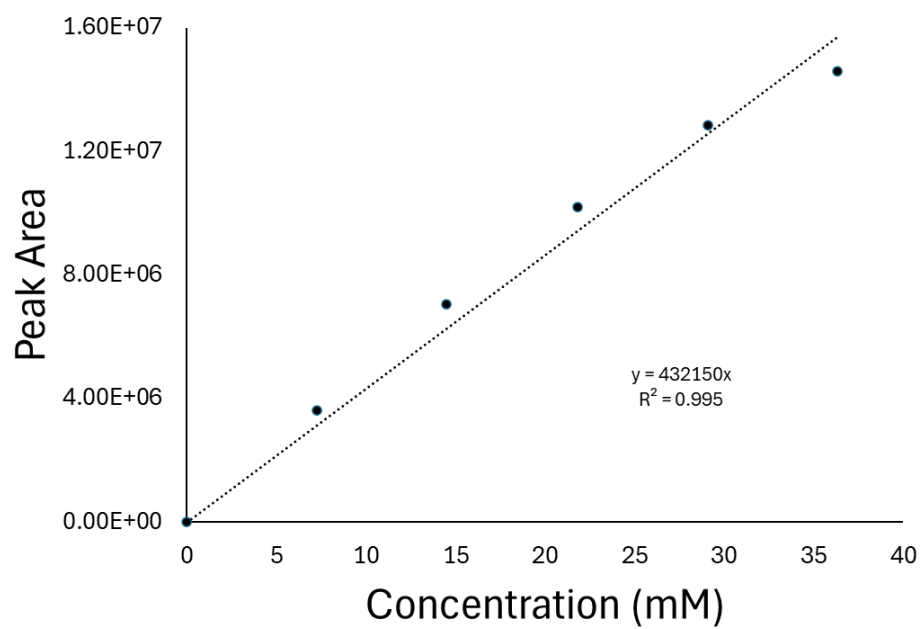

**Figure S7:** GC-MS calibration curve for toluene.

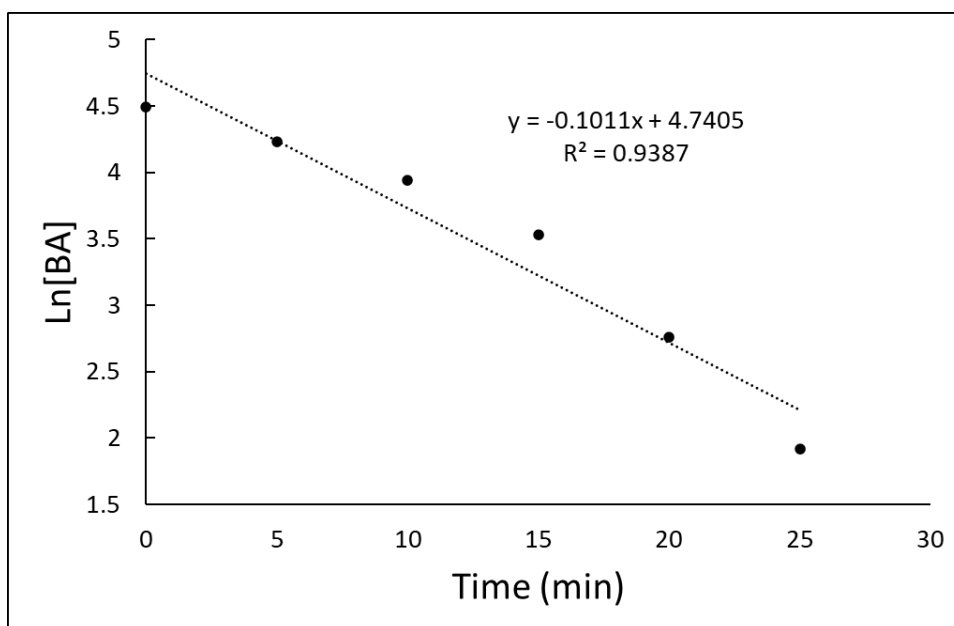

**Figure S8:** Cycle 1 consumption of benzyl alcohol over time.

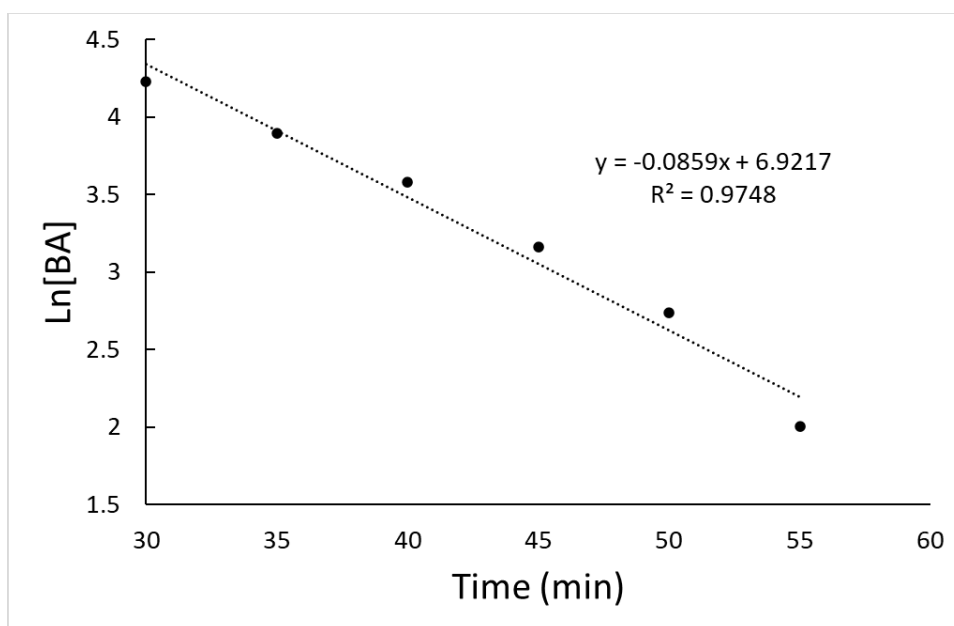

**Figure S9:** Cycle 2 consumption of benzyl alcohol over time.

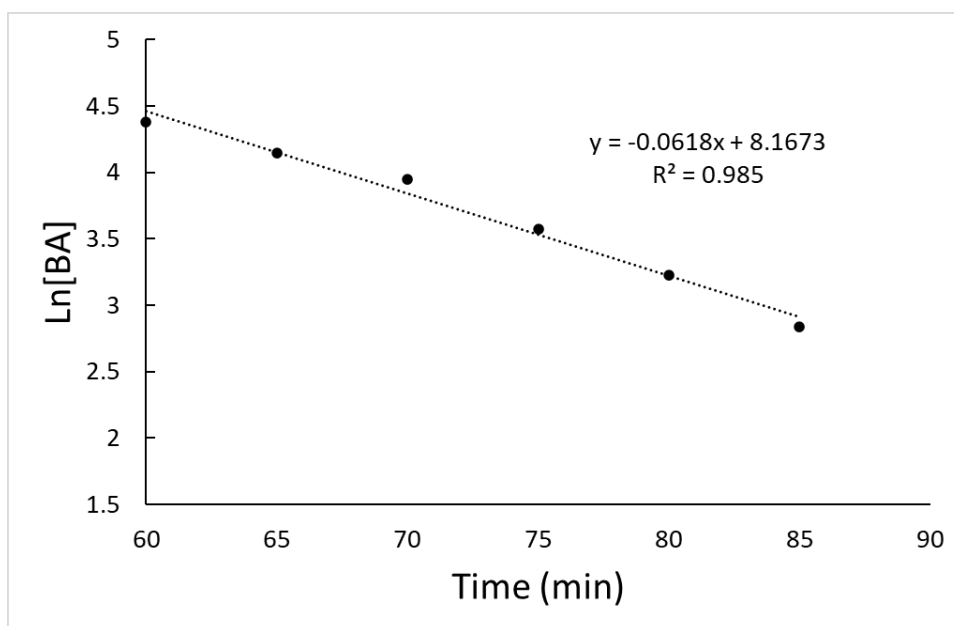

**Figure S10:** Cycle 3 consumption of benzyl alcohol over time.

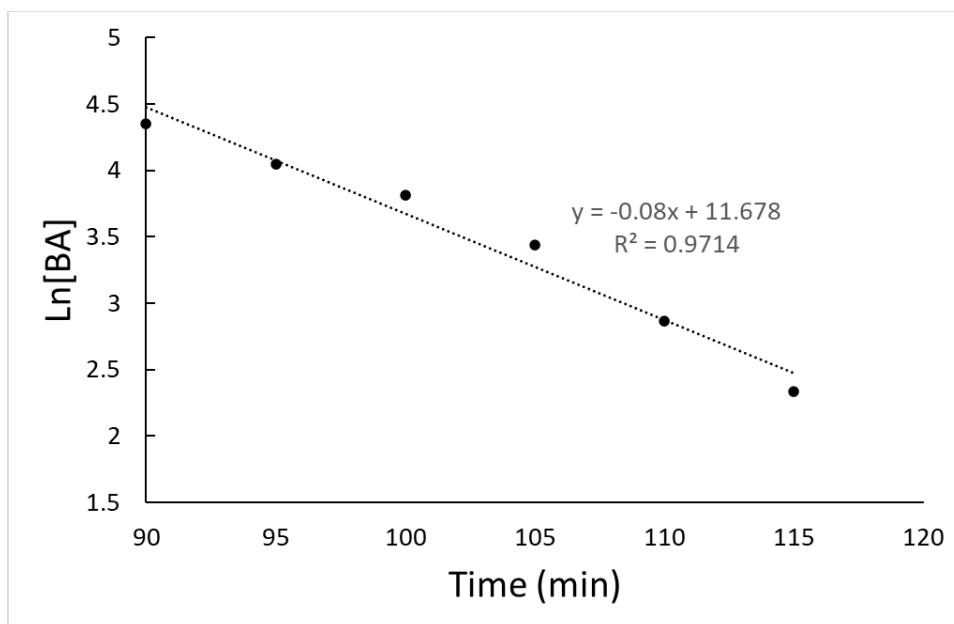

**Figure S11:** Cycle 4 consumption of benzyl alcohol over time.

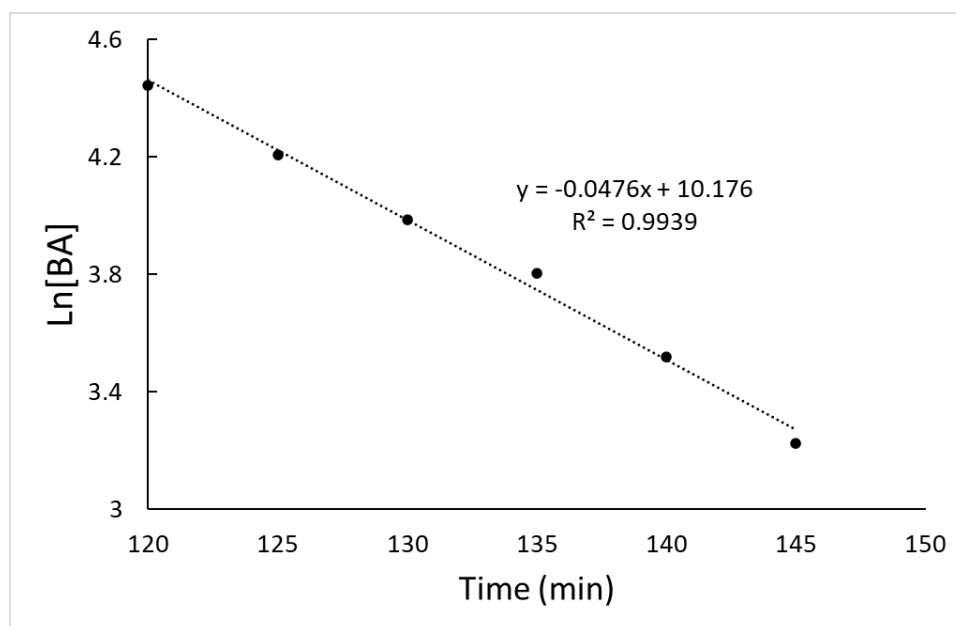

**Figure S12:** Cycle 5 consumption of benzyl alcohol over time.
